# Supplementary material for: Variation in the Analysis of Positively Selected Sites Using Nonsynonymous/Synonymous Rate Ratios: An Example Using Influenza Virus
Source: PLoS One. 2011 May 24;6(5):e19996. doi: 10.1371/journal.pone.0019996 (PMC3101217; doi:10.1371/journal.pone.0019996)
Supplement: Table S2 — The codons and amino acid residues (in parentheses) of fourteen sites within data set 1 and data set 2. (XLS) [file pone.0019996.s002.xls]

## Sheet: Sheet 1
	Supporting Information
	Table S2. The codon and amino acid residues (in the parentheses) of fourteen sites within data sets 1 and data set 2
		Site 2		Site 3		Site 50		Site 82		Site 83		Site 133		Site 138		Site 156		Site 157		Site 158		Site 173		Site 186		Site 196		Site 278
	Isolation year	Data set 1	Data set 2	Data set 1	Data set 2	Data set 1	Data set 2	Data set 1	Data set 2	Data set 1	Data set 2	Data set 1	Data set 2	Data set 1	Data set 2	Data set 1	Data set 2	Data set 1	Data set 2	Data set 1	Data set 2	Data set 1	Data set 2	Data set 1	Data set 2	Data set 1	Data set 2	Data set 1	Data set 2
	1968	GAC(D)	GAC(D)	CTT(L)	CTT(L)	AAA(K)	AAA(K)	GAG(E)	GAG(E)	ACA(T)	ACA(T)	AAT(N)	AAT(N)	GCT(A)	GCT(A)	AAA(K)	AAA(K)	TCA(S)	TCA(S)	GGA(G)	GGA(G)	AAT(N)	AAT(N)	AGC(S)	AGC(S)	GTT(V)	GTT(V)	ATT(I)	ATT(I)
	1969	GAC(D)	GAC(D)	CTT(L)	CTT(L)	AAA(K)	AAA(K)	GAG(E)	GAG(E)	ACA(T)	ACA(T)	AAT(N)	AAT(N)	GCT(A)	GCT(A)	AAA(K)	AAA(K)	TCA(S)	TCA(S)	GGA(G)	GGA(G)	AAT(N)	AAT(N)	AGC(S)	AGC(S)	GTT(V)	GTT(V)	ATT(I)	ATT(I)
	1970	GAC(D)	GAC(D)	CTT(L)	CTT(L)	AAA(K)	AAA(K)	GAG(E)	GAG(E)	ACA(T)	ACA(T)	AAT(N)	AAT(N)	GCT(A)	GCT(A)	AAA(K)	AAA(K)	TCA(S)	TCA(S)	GGA(G)	GGA(G)	AAT(N)	AAT(N)	AGC(S)	AGC(S)	GTT(V)	GTT(V)	ATT(I)	ATT(I)
	1971	GAC(D)	TAC(Y)	CTT(L)	CTT(L)	AAA(K)	AAA(K)	GAG(E)	GAG(E)	ACA(T)	ACA(T)	AAT(N)	AAT(N)	GCT(A)	GCT(A)	AAA(K)	AAA(K)	TCA(S)	TCA(S)	GGA(G)	GAA(E)	AAT(N)	AAT(N)	AGC(S)	AGC(S)	GTA(V)	GTT(V)	ATT(I)	ATT(I)
	1972	GAC(D)	GAC(D)	CTT(L)	TTT(F)	AAA(K)	AAA(K)	GAG(E)	GAG(E)	ACA(T)	ACA(T)	AAT(N)	AAT(N)	GCT(A)	GCT(A)	AAA(K)	AAA(K)	TCA(S)	TCA(S)	GGA(G)	GGA(G)	AAT(N)	AAT(N)	AGC(S)	AGC(S)	GTA(V)	GTT(V)	ATT(I)	ATT(I)
	1973	GAT(D)	GAC(D)	TTT(F)	TTT(F)	AAA(K)	AAA(K)	GAG(E)	GAG(E)	ACA(T)	ACA(T)	AAT(N)	AAT(N)	GCT(A)	GCT(A)	AAA(K)	AAA(K)	TCA(S)	TCA(S)	GGA(G)	GGA(G)	AAT(N)	AAT(N)	AGC(S)	AGC(S)	GTT(V)	GTT(V)	ATT(I)	ATT(I)
	1974	GAC(D)	GAC(D)	CTT(L)	CTT(L)	AAA(K)	AAA(K)	GAG(E)	GAG(E)	AAA(K)	AAA(K)	AAT(N)	AAT(N)	GCT(A)	GCT(A)	AAA(K)	AAA(K)	TCA(S)	TCA(S)	GGA(G)	GGA(G)	AAT(N)	AAT(N)	AGC(S)	AGC(S)	GTT(V)	GTT(V)	AGT(S)	ATT(I)
	1975	GAC(D)	GAC(D)	CTT(L)	CTT(L)	AAA(K)	AAA(K)	GAG(E)	GAG(E)	AAA(K)	AAA(K)	AAT(N)	AAT(N)	GCT(A)	GCT(A)	AAA(K)	AAA(K)	TCA(S)	TCA(S)	GGA(G)	GGA(G)	AAT(N)	AAT(N)	AGC(S)	AAC(N)	GTT(V)	GTT(V)	AGC(S)	AGC(S)
	1976	GAC(D)	GGC(G)	CTT(L)	CTT(L)	AAA(K)	AAA(K)	GAG(E)	GAG(E)	AAA(K)	AAA(K)	AAT(N)	AAT(N)	GCT(A)	TCT(S)	AAA(K)	AAA(K)	TCA(S)	TCA(S)	GGA(G)	GGA(G)	AAC(N)	AAC(N)	AGC(S)	AGC(S)	GTT(V)	GTT(V)	AGC(S)	AGC(S)
	1977	AAC(N)	AAC(N)	CTT(L)	CTT(L)	AGA(R)	AGA(R)	GAG(E)	GAG(E)	AAA(K)	AAA(K)	AAT(N)	AAT(N)	GCT(A)	GCT(A)	AAA(K)	AAA(K)	TCA(S)	TCA(S)	GAA(E)	GAA(E)	AAT(N)	AAT(N)	AGC(S)	AGC(S)	GTT(V)	GTT(V)	AGC(S)	AGT(S)
	1978	AAC(N)	AAC(N)	CTT(L)	CTT(L)	AGA(R)	AGA(R)	GAG(E)	GAG(E)	AAA(K)	AAA(K)	AAT(N)	AAT(N)	GCT(A)	GCT(A)	AAA(K)	GAA(E)	TCA(S)	TCA(S)	GAA(E)	GAA(E)	AAT(N)	AAT(N)	AGC(S)	AGC(S)	GTT(V)	GTT(V)	AGT(S)	AGT(S)
	1979	AAC(N)	AAC(N)	CTT(L)	CTT(L)	AGA(R)	AGA(R)	GAG(E)	GAG(E)	AAA(K)	AAA(K)	AGT(S)	AGT(S)	GCT(A)	GCT(A)	GAA(E)	GAA(E)	TCA(S)	TCA(S)	GAA(E)	GAA(E)	AAT(N)	AAT(N)	AGC(S)	AGC(S)	GTT(V)	GTT(V)	AGT(S)	ATT(I)
	1980	AAC(N)	AAC(N)	CTT(L)	CTT(L)	AGA(R)	AGA(R)	GAG(E)	GAG(E)	AAA(K)	AAA(K)	AGT(S)	AGT(S)	GCT(A)	GCT(A)	GAA(E)	GAA(E)	TCA(S)	TCA(S)	GAA(E)	GAA(E)	AAT(N)	AAT(N)	AGC(S)	AGC(S)	GTT(V)	GTT(V)	AGT(S)	AGT(S)
	1981	AAC(N)	AAA(K)	CTT(L)	CTT(L)	AGA(R)	AGA(R)	GAG(E)	GAG(E)	AAA(K)	AAA(K)	AGT(S)	AGT(S)	GCT(A)	GCT(A)	GAA(E)	GAA(E)	TCA(S)	TCA(S)	GAA(E)	GAA(E)	AAT(N)	AAT(N)	AGC(S)	AGC(S)	GTT(V)	GTT(V)	AGT(S)	AGT(S)
	1982	AAC(N)	AAC(N)	CTT(L)	CTT(L)	AAA(K)	AGG(R)	GAG(E)	GAG(E)	AAA(K)	AAA(K)	AGT(S)	AGT(S)	GCT(A)	ACT(T)	GAA(E)	GAA(E)	TCA(S)	TCA(S)	GAA(E)	GAA(E)	AAT(N)	AAA(K)	AGC(S)	AGC(S)	GTT(V)	ATT(I)	AGT(S)	AGT(S)
	1983	AAA(K)	AAC(N)	CTT(L)	CTT(L)	AGA(R)	AGA(R)	GAG(E)	GAG(E)	AAA(K)	AAA(K)	AGT(S)	AGT(S)	ACT(T)	GCT(A)	GAA(E)	GAA(E)	TCA(S)	TCA(S)	GAA(E)	GAA(E)	AAA(K)	AAT(N)	AGC(S)	AGC(S)	GTT(V)	GTT(V)	AGT(S)	AGT(S)
	1984	AAA(K)	AAA(K)	CTT(L)	CTT(L)	AGA(R)	AGA(R)	GAG(E)	GAG(E)	AAA(K)	AAA(K)	AGT(S)	AGT(S)	GCT(A)	GCT(A)	GAA(E)	AAA(K)	TCA(S)	TCA(S)	GAA(E)	GAA(E)	AAA(K)	AAA(K)	AGC(S)	AGC(S)	GTT(V)	GTT(V)	AGT(S)	AGT(S)
	1985	AAA(K)	AAA(K)	CTT(L)	CTT(L)	AGA(R)	AGA(R)	GAG(E)	GAG(E)	AAA(K)	AAA(K)	AGT(S)	AGT(S)	GCT(A)	GCT(A)	GAA(E)	AAG(K)	TCA(S)	TCA(S)	GAA(E)	GAA(E)	AAA(K)	AAA(K)	AGC(S)	AGC(S)	GTT(V)	GTT(V)	AGT(S)	AGT(S)
	1986	AAA(K)	AAA(K)	CTG(L)	CTT(L)	CGA(R)	AGA(R)	GAG(E)	GAG(E)	AAA(K)	AAA(K)	AGT(S)	AGT(S)	GCT(A)	GCT(A)	GAA(E)	GAA(E)	TCA(S)	TCA(S)	GAA(E)	GAA(E)	AAA(K)	AAA(K)	AGC(S)	ATC(I)	GTT(V)	GTT(V)	AGT(S)	AGT(S)
	1987	AAA(K)	AAA(K)	CTT(L)	CTT(L)	AGA(R)	AGA(R)	GAG(E)	GAG(E)	AAA(K)	AAA(K)	AGT(S)	AGT(S)	GCT(A)	GCT(A)	GAA(E)	GAA(E)	TCA(S)	TCA(S)	GAA(E)	GAA(E)	AAA(K)	AAA(K)	ATC(I)	AGC(S)	GTT(V)	GTT(V)	AGT(S)	AGT(S)
	1988	AAA(K)	AAA(K)	CTT(L)	ATG(M)	AGA(R)	AGA(R)	GAG(E)	GAG(E)	AAA(K)	AAA(K)	AGT(S)	AGT(S)	TCT(S)	GCT(A)	GAA(E)	GAA(E)	TCA(S)	TCA(S)	GAA(E)	GAA(E)	AAA(K)	AAA(K)	AGC(S)	AGC(S)	GTT(V)	GTT(V)	AGT(S)	AGT(S)
	1989	AAA(K)	AAA(K)	CTT(L)	CTT(L)	AGA(R)	CGA(R)	AAG(K)	AAG(K)	GAA(E)	GAA(E)	AGT(S)	AGT(S)	GCT(A)	GCT(A)	GAA(E)	GAA(E)	TCA(S)	TCA(S)	GAA(E)	GAA(E)	AAA(K)	AAA(K)	AGC(S)	ATC(I)	GTT(V)	ATT(I)	AGT(S)	AGT(S)
	1990	AAA(K)	AAA(K)	CTT(L)	CTT(L)	CGA(R)	AGA(R)	AAG(K)	AAG(K)	GAA(E)	GAA(E)	AGT(S)	AGT(S)	GCT(A)	GCT(A)	GAA(E)	GAA(E)	TCA(S)	TCA(S)	GAA(E)	GAA(E)	AAA(K)	AAA(K)	AGC(S)	AGC(S)	GTT(V)	GTT(V)	AGT(S)	AGT(S)
	1991	AAA(K)	AAA(K)	CTT(L)	CTT(L)	CGA(R)	AGA(R)	AAG(K)	AAG(K)	GAA(E)	GAA(E)	AGT(S)	AGT(S)	ACT(T)	GCT(A)	GAA(E)	GAA(E)	TCA(S)	TCA(S)	GAA(E)	GAA(E)	AAA(K)	AAA(K)	AGC(S)	ATC(I)	GTT(V)	GTT(V)	AGT(S)	AAT(N)
	1992	AAA(K)	AAA(K)	CTT(L)	CTT(L)	AGA(R)	AGA(R)	AAG(K)	AAG(K)	GAA(E)	GAA(E)	AAT(N)	AGT(S)	GCT(A)	GCT(A)	GAA(E)	GAA(E)	TCA(S)	TCA(S)	GAA(E)	GAT(D)	AAA(K)	AAA(K)	AGC(S)	AGC(S)	ATT(I)	GTT(V)	AGT(S)	AGT(S)
	1993	AAA(K)	AAA(K)	CTT(L)	CTT(L)	AGA(R)	AGA(R)	AAG(K)	AAG(K)	GAA(E)	GAA(E)	GAT(D)	AAT(N)	GCT(A)	GCT(A)	AAA(K)	GAA(E)	TTA(L)	TCA(S)	GAA(E)	GAA(E)	AAA(K)	AAA(K)	AGC(S)	AGC(S)	GTT(V)	ATT(I)	AGT(S)	AGT(S)
	1994	AAA(K)	AAA(K)	CTT(L)	CTT(L)	AGA(R)	AGA(R)	AAG(K)	AAG(K)	GAA(E)	GAA(E)	GAT(D)	GAT(D)	GCT(A)	GCT(A)	AAA(K)	AAA(K)	TTA(L)	TTA(L)	GAA(E)	GAA(E)	AAA(K)	AAA(K)	AGC(S)	AGC(S)	GTC(V)	GTT(V)	AGT(S)	AGT(S)
	1995	AAA(K)	AAA(K)	CTT(L)	CTT(L)	AGA(R)	AGA(R)	AAG(K)	AAG(K)	GAA(E)	GAA(E)	GAT(D)	GAT(D)	GCT(A)	GCT(A)	AAA(K)	AAA(K)	TTA(L)	TTA(L)	GAA(E)	GAA(E)	AAA(K)	AAA(K)	AGC(S)	AGC(S)	GTT(V)	GTT(V)	AAT(N)	AAT(N)
	1996	AAA(K)	AAA(K)	CTT(L)	CTT(L)	AGA(R)	AGA(R)	AAG(K)	AAG(K)	GAA(E)	GAA(E)	GAT(D)	GAT(D)	GCT(A)	GCT(A)	AAA(K)	AAA(K)	TTA(L)	TTA(L)	GAA(E)	GAA(E)	AAA(K)	AAA(K)	AGC(S)	AGT(S)	GTT(V)	GTT(V)	AAT(N)	AAT(N)
	1997	AAA(K)	AAA(K)	CTT(L)	CTT(L)	AGA(R)	AGA(R)	AAG(K)	GAG(E)	GAA(E)	GAA(E)	AAT(N)	AAT(N)	GCT(A)	GCT(A)	CAA(Q)	AAA(K)	TTA(L)	TTA(L)	AAA(K)	GAA(E)	AAA(K)	AAA(K)	AGT(S)	AGT(S)	GCT(A)	GCT(A)	AAT(N)	AAT(N)
	1998	AAA(K)	AAA(K)	CTT(L)	CTT(L)	AGA(R)	AGA(R)	AAG(K)	AAG(K)	GAA(E)	GAA(E)	AAT(N)	AAT(N)	GCT(A)	GCT(A)	CAA(Q)	CAA(Q)	TTA(L)	TTA(L)	AAA(K)	AAA(K)	AAA(K)	AAA(K)	AGT(S)	AGT(S)	GCT(A)	GCT(A)	AAT(N)	AAT(N)
	1999	AAA(K)	AAA(K)	CTT(L)	CTT(L)	AGA(R)	AGA(R)	AAG(K)	AAG(K)	GAA(E)	GAA(E)	AAT(N)	AAT(N)	GCT(A)	TCT(S)	CAA(Q)	CAA(Q)	TTA(L)	TTA(L)	AAA(K)	AAA(K)	AAA(K)	AAA(K)	AGT(S)	AGT(S)	GCT(A)	ACC(T)	AAT(N)	AAT(N)
	2000	AAA(K)	AAA(K)	CTT(L)	CTT(L)	AGA(R)	GGA(G)	AAG(K)	AAG(K)	GAA(E)	GAA(E)	AAT(N)	AAT(N)	GCT(A)	GCT(A)	CAA(Q)	CAA(Q)	TTA(L)	TTA(L)	AAA(K)	AAA(K)	AAA(K)	AAA(K)	AGT(S)	AGT(S)	GCT(A)	GCT(A)	AAT(N)	AAT(N)
	2001	AAA(K)	AAA(K)	CTT(L)	CTT(L)	AGA(R)	GGA(G)	AAG(K)	AAG(K)	GAA(E)	GAA(E)	AAT(N)	AAT(N)	GCT(A)	GCT(A)	CAA(Q)	CAA(Q)	TTA(L)	TTA(L)	AAA(K)	AAA(K)	AAA(K)	AAA(K)	GGT(G)	AGT(S)	GCT(A)	GCT(A)	AAT(N)	AAT(N)
	2002	AAA(K)	AAA(K)	CTT(L)	CTT(L)	AGA(R)	AGA(R)	AAG(K)	AAG(K)	GAA(E)	GAA(E)	AAT(N)	AAT(N)	GCT(A)	GCT(A)	CAA(Q)	CAA(Q)	TTA(L)	TTA(L)	AAA(K)	AAA(K)	AAA(K)	AAA(K)	GGT(G)	GGT(G)	GCT(A)	GCT(A)	AAT(N)	AAT(N)
	2003	AAA(K)	AAA(K)	CTT(L)	CTT(L)	GGA(G)	GGA(G)	AAG(K)	AAG(K)	AAA(K)	AAA(K)	AAT(N)	AAT(N)	GCT(A)	GCT(A)	CAC(H)	CAC(H)	TTA(L)	TTA(L)	AAA(K)	AAA(K)	AAA(K)	AAA(K)	GGT(G)	GGT(G)	GCT(A)	GCT(A)	AAT(N)	AAT(N)
	2004	AAA(K)	AAA(K)	CTT(L)	CTT(L)	GGA(G)	GAA(E)	AAG(K)	ACG(T)	AAA(K)	AAA(K)	AAT(N)	AAT(N)	GCT(A)	GCT(A)	CAT(H)	CAC(H)	TTA(L)	TTA(L)	AAA(K)	AAA(K)	AAA(K)	AAA(K)	GGT(G)	GGG(G)	GCT(A)	GCT(A)	AAT(N)	AAT(N)
	2005	AAA(K)	AAA(K)	CTT(L)	CTT(L)	GGA(G)	GGA(G)	AAG(K)	AAG(K)	AAA(K)	AAA(K)	AAT(N)	AAT(N)	GCT(A)	GCT(A)	CAC(H)	CAC(H)	TTA(L)	TTA(L)	AAA(K)	AAA(K)	AAA(K)	AAA(K)	GGT(G)	GGT(G)	GCT(A)	GCT(A)	AAT(N)	AAT(N)
	2006	AAA(K)	AAA(K)	CTT(L)	CTT(L)	GGA(G)	GAA(E)	AAG(K)	AAG(K)	AAA(K)	AAA(K)	AAT(N)	AAT(N)	GCT(A)	GCT(A)	CAC(H)	CAC(H)	TTA(L)	TCA(S)	AAA(K)	AAA(K)	AAA(K)	AAA(K)	GGT(G)	GGT(G)	GCT(A)	GCT(A)	AAT(N)	AAT(N)
	2007	AAA(K)	AAA(K)	CTT(L)	CTT(L)	GAA(E)	GGA(G)	AAG(K)	AAG(K)	AAA(K)	AAA(K)	AAC(N)	AAT(N)	GCT(A)	GCT(A)	CAC(H)	CAC(H)	TTA(L)	TCA(S)	AAA(K)	AAA(K)	AAA(K)	GAA(E)	GGT(G)	GGT(G)	GCT(A)	GCT(A)	AAT(N)	AAT(N)
	2008	AAA(K)	AAA(K)	CTT(L)	TTT(F)	GAA(E)	GAA(E)	AAG(K)	AAG(K)	AAA(K)	AAT(N)	AAC(N)	AAC(N)	GCT(A)	GCT(A)	CAC(H)	CAC(H)	TTA(L)	TCA(S)	AAA(K)	AAA(K)	CAA(Q)	AAT(N)	GGT(G)	GGT(G)	GCT(A)	GCT(A)	AAT(N)	AAT(N)
	2009	AAA(K)	AAA(K)	CTT(L)	CTT(L)	GAA(E)	GAA(E)	AAG(K)	AAG(K)	AAA(K)	AAA(K)	AAC(N)	AAC(N)	GCT(A)	GCT(A)	CAC(H)	CAC(H)	TTA(L)	TTA(L)	AAA(K)	AAC(N)	CAA(Q)	CAA(Q)	GGT(G)	GGT(G)	GCT(A)	GCT(A)	AAT(N)	AAT(N)
	2010	AAA(K)	AAA(K)	CTT(L)	CTT(L)	GAA(E)	GAA(E)	AAG(K)	AAG(K)	AAA(K)	AAA(K)	AAC(N)	AAC(N)	GCT(A)	GCT(A)	CAC(H)	CAC(H)	TTA(L)	TTA(L)	AAC(N)	AAC(N)	CAA(Q)	CAA(Q)	GGT(G)	GGT(G)	GCT(A)	GCT(A)	AAT(N)	AAT(N)
	Number of synonymous substitutions	1	0	1	0	2	2	0	0	0	0	1	1	0	0	1	0	0	0	0	0	1	1	1	2	1	0	1	1
	Number of nonsynonymous substitutions	2	4	1	3	3	5	1	3	3	4	4	4	3	3	4	6	1	3	3	4	2	4	2	4	3	4	2	3
